# Supplementary material for: Evaluation of anti-biofilm activity of acidic amino acids and synergy with ciprofloxacin on Staphylococcus aureus biofilms
Source: PubMed Central journal article supplement (PMC7265346; doi:10.1038/s41598-020-66082-x), 2020-06-02
Supplement: 41598_2020_66082_MOESM1_ESM.pdf [file 41598_2020_66082_MOESM1_ESM.pdf]

Supplementary Information for:

Evaluation of anti-biofilm activity of acidic amino acids and synergy with ciprofloxacin on *Staphylococcus aureus* biofilms

Annsar A Warraich<sup>1, 4</sup>, Afzal Mohammed<sup>1</sup>, Yvonne Perrie<sup>2</sup>, Majad Hussain<sup>3</sup>, Hazel Gibson<sup>4</sup>, Ayesha Rahman\*<sup>4</sup>

<sup>1</sup>Aston Pharmacy School, Aston University, Birmingham, B4 7ET, UK; <sup>2</sup>University of Strathclyde, Glasgow, G1 1XQ; <sup>3</sup>Quest Healthcare Ltd, Birmingham, UK; <sup>4</sup>University of Wolverhampton, WV1 1LY, UK

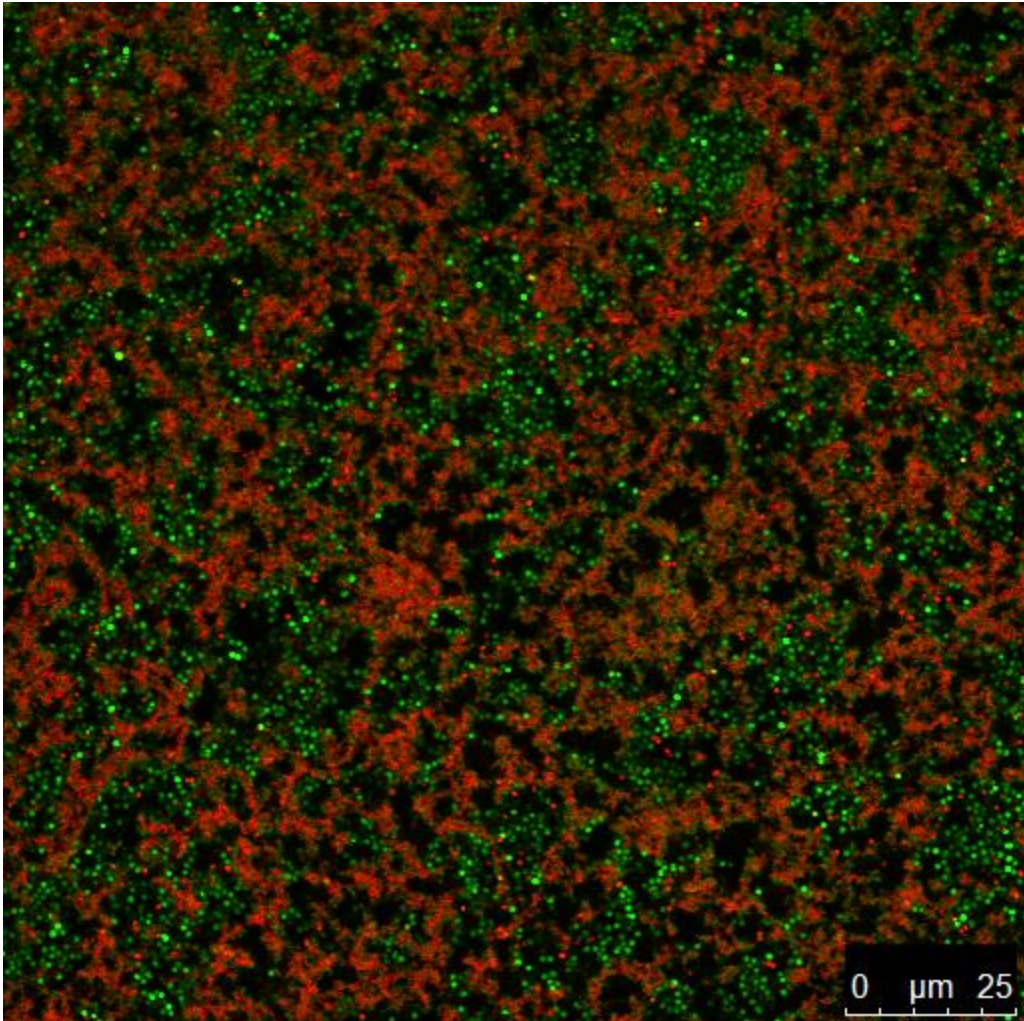

**Supplementary Figure 1:** Confocal Image of biofilm dispersed with Cip alone. eDNA is present as seemingly well fortified boundaries, enclosing persisting *S. aureus* cells.

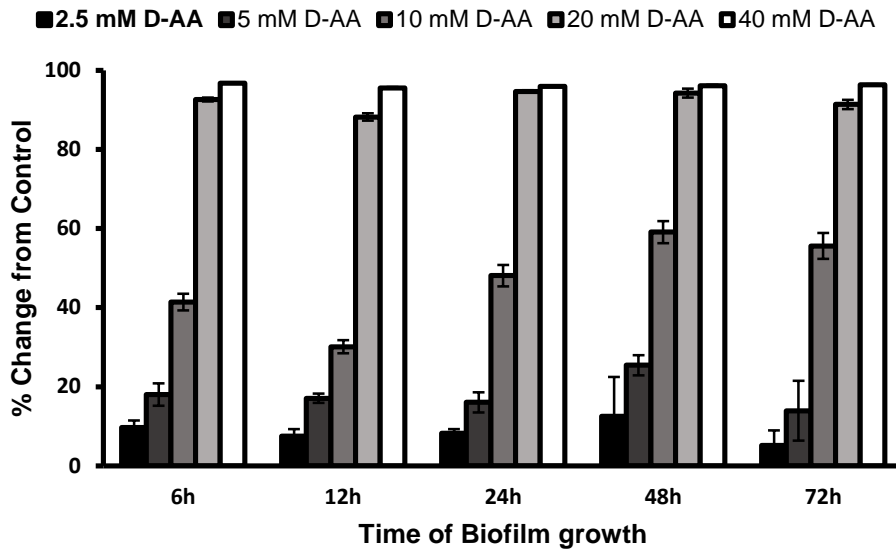

**Supplementary Figure 2:** Percentage change from control upon biofilm inhibition; n=3.

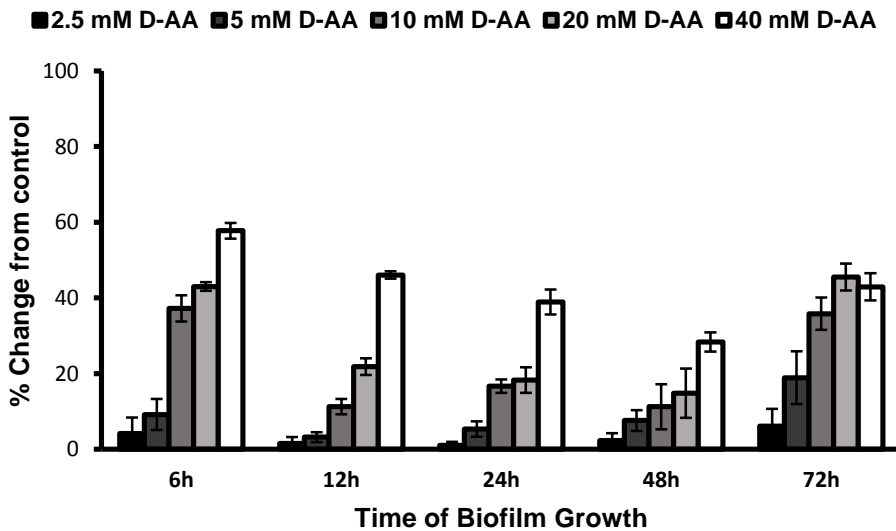

**Supplementary Figure 3:** Percentage change from control upon biofilm dispersal; n=3.

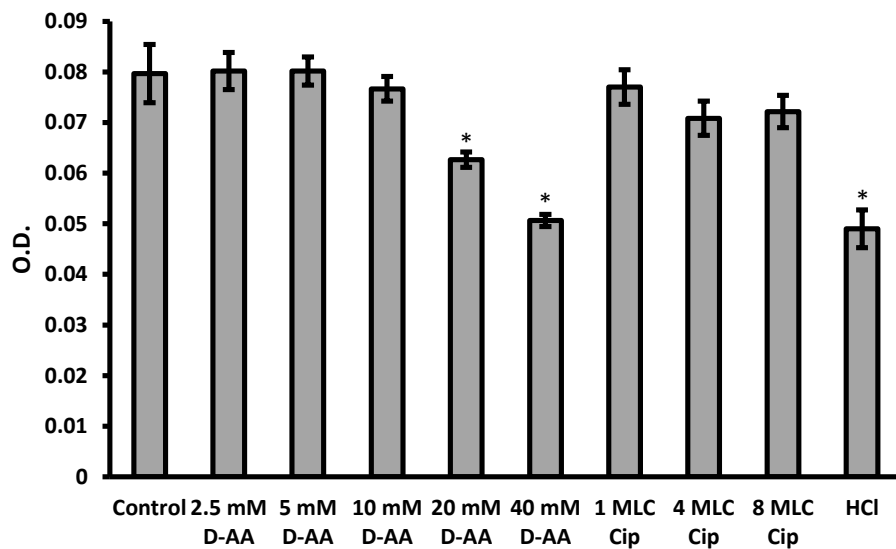

**Supplementary Figure 4:** Effect of D-AA at concentrations of 2.5, 5, 10, 20 and 40mM, and Cip at concentrations of 1 MLC, 4 MLC and 8 MLC on the Optical density of planktonic *S. aureus* growth after 30 minutes of exposure. One-way ANOVA showed an overall significant difference within the data and was followed by a post-hoc t-test with Bonferroni correction to see which concentration significantly ( $p < 0.005$  was taken as significant; indicated by \*) killed or effected planktonic growth of *S. aureus* compared to the control. Significant effect on planktonic growth of *S. aureus* was observed with 20mM and 40mM D-AA;  $n=6$ .

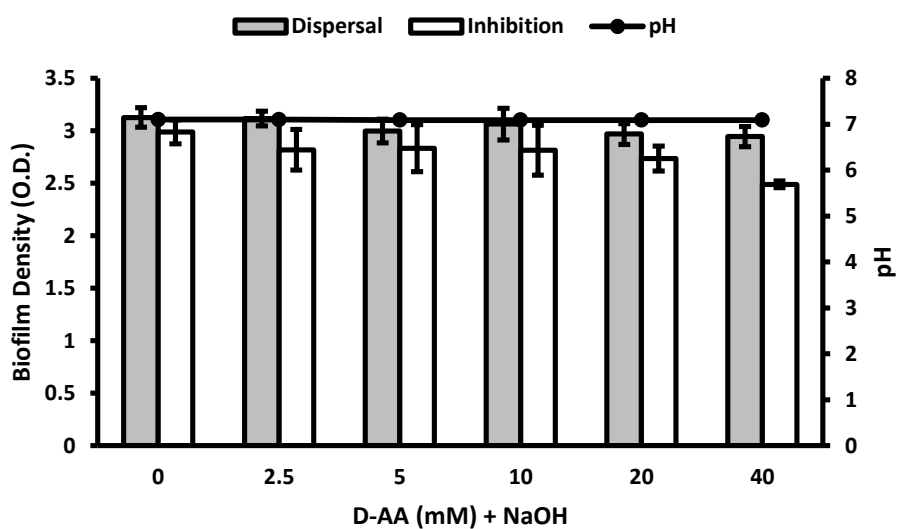

**Supplementary Figure 5:** Effect of NaOH on the anti-biofilm activity of D-AA. Neutralising acidic amino acids using NaOH resulted in the anti-biofilm activity of these agents to be halted; n=4.

**Supplementary Table 1:** Comparison of percent change in biofilm density with percent change in viable cells for dispersed biofilms. There is a greater reduction in number of viable cells as compared to the reduction in total biomass. This pattern is more prominent in dispersed biofilms than inhibited.

| <b>Dispersing agent</b> | <b>Percent reduction<br/>in biofilm density</b> | <b>Percent reduction<br/>in cell viability</b> |
|-------------------------|-------------------------------------------------|------------------------------------------------|
| <b>40mM D-AA</b>        | 30.16                                           | 97.59                                          |
| <b>40mM L-AA</b>        | 44.92                                           | 98.55                                          |
| <b>40mM D-AA + 8</b>    | 32.00                                           | 96.09                                          |
| <b>MLC</b>              |                                                 |                                                |

**Supplementary Table 2:** Comparison of percent change in biofilm density with percent change in viable cells for inhibited biofilms. There is a greater reduction in number of viable cells as compared to the reduction in total biomass. This pattern is more prominent in dispersed biofilms than inhibited.

| <b>Inhibiting agent</b> | <b>Percent reduction<br/>in biofilm density</b> | <b>Percent reduction<br/>in cell viability</b> |
|-------------------------|-------------------------------------------------|------------------------------------------------|
| <b>40mM D-AA</b>        | 92.78                                           | 99.98                                          |
| <b>40mM L-AA</b>        | 97.01                                           | 99.98                                          |
| <b>40mM D-AA + 8</b>    | 93.58                                           | 99.99                                          |
| <b>MLC</b>              |                                                 |                                                |

**Supplementary Table 3:** Percentage of eDNA present in AA and Cip treated biofilms as compared to treated biofilms was quantified using ImageJ. Table also presents percentage reduction in eDNA compared to control.

|                | <b>Inhibiton</b>              |                                         | <b>Dispersal</b>              |                                         |
|----------------|-------------------------------|-----------------------------------------|-------------------------------|-----------------------------------------|
|                | % of eDNA compared to control | % reduction in eDNA compared to control | % of eDNA compared to control | % reduction in eDNA compared to control |
| <b>Control</b> | 100                           | 0                                       | 100                           | 0                                       |
| <b>AA</b>      | 1.96 ± 0.67                   | 98.04 ± 0.67                            | 4.24 ± 1.66                   | 95.76 ± 1.66                            |
| <b>Cip</b>     | 61.47 ± 19.27                 | 38.53 ± 19.27                           | 127.41 ± 43.28                | -27.41 ± 43.28                          |
